# Supplementary material for: What Are the Opportunities for EEG-Based Monitoring of Delirium in the ICU?
Source: Atypon-hosted journal article supplement (doi:10.1176/appi.neuropsych.11110347), 2012-10-01
Supplement: 472_ds001.pdf [file 472_ds001.pdf]

## APPENDIX 1: Search strings

**Table I: Pubmed search for EEG and delirium.**

| Pubmed |                                                                                                                                                                                                                                                                                                                                                                                                                                                     |            |
|--------|-----------------------------------------------------------------------------------------------------------------------------------------------------------------------------------------------------------------------------------------------------------------------------------------------------------------------------------------------------------------------------------------------------------------------------------------------------|------------|
|        | Search term                                                                                                                                                                                                                                                                                                                                                                                                                                         | Hits       |
| #1     | “delirium” [Title/Abstract] OR “delirious” [Title/Abstract] OR “icu syndrome” [Title/Abstract] OR “intensive care syndrome” [Title/Abstract] OR “intensive care unit syndrome” [Title/Abstract] OR “delusion” [Title/Abstract] OR “delusions” [Title/Abstract] OR “delusional” [Title/Abstract] OR “factual” [Title/Abstract] OR "ICU psychosis" [Title/Abstract] OR "acute confusional state" [Title/Abstract] OR "brain failure" [Title/Abstract] | 16,446     |
| #2     | "Delirium"[Mesh]                                                                                                                                                                                                                                                                                                                                                                                                                                    | 4,612      |
| #3     | #1 OR #2                                                                                                                                                                                                                                                                                                                                                                                                                                            | 17,638     |
| #4     | “eeg” [Title/Abstract] OR “electroencephalogram” [Title/Abstract] OR “electroencephalography” [Title/Abstract] OR “brain waves” [Title/Abstract] OR “alpha rhythm” [Title/Abstract] OR “beta rhythm” [Title/Abstract] OR “delta rhythm” [Title/Abstract] OR “theta rhythm” [Title/Abstract]                                                                                                                                                         | 57,165     |
| #5     | "Electroencephalography"[Mesh]                                                                                                                                                                                                                                                                                                                                                                                                                      | 111,827    |
| #6     | #4 OR #5                                                                                                                                                                                                                                                                                                                                                                                                                                            | 123,948    |
| #7     | #3 AND #6 AND [humans]/lim AND ([english]/lim) OR [french]/lim) OR [dutch/lim] OR [german]/lim)                                                                                                                                                                                                                                                                                                                                                     | 472        |
|        | <b>Total</b>                                                                                                                                                                                                                                                                                                                                                                                                                                        | <b>472</b> |

**Table II: Embase search for EEG and delirium.**

| <b>Embase</b> |                                                                                                                                                                                                                                                                                                                 |             |
|---------------|-----------------------------------------------------------------------------------------------------------------------------------------------------------------------------------------------------------------------------------------------------------------------------------------------------------------|-------------|
|               | <b>Search term</b>                                                                                                                                                                                                                                                                                              | <b>Hits</b> |
| #1            | 'delirium':ab,ti OR 'delirious':ab,ti OR 'icu syndrome':ab,ti OR 'intensive care syndrome':ab,ti OR 'intensive care unit syndrome':ab,ti OR 'delusion':ab,ti OR 'delusions':ab,ti OR 'delusional':ab,ti OR 'factual':ab,ti OR 'icu psychosis':ab,ti OR 'acute confusional state':ab,ti OR 'brain failure':ab,ti | 21,894      |
| #2            | 'eeg':ab,ti OR 'electroencephalogram':ab,ti OR 'electroencephalography':ab,ti OR 'brain waves':ab,ti OR 'alpha rhythm':ab,ti OR 'beta rhythm':ab,ti OR 'delta rhythm':ab,ti OR 'theta rhythm':ab,ti                                                                                                             | 75,391      |
| #3            | #1 AND #2 AND [humans]/lim AND ([english]/lim OR [french]/lim OR [dutch]/lim OR [german]/lim)                                                                                                                                                                                                                   | 299         |
|               | <b>Total</b>                                                                                                                                                                                                                                                                                                    | <b>299</b>  |

## APPENDIX 2: Quantitative EEG

### Background quantitative EEG

In quantitative electroencephalography (QEEG), multichannel recordings of EEG are visually or automatically edited to create a sample of artifact-free data. These artifact free-data samples are analyzed using the Fast Fourier Transform. With this technique the power can be quantified at each EEG frequency. The power represents the amount of EEG activity in a particular frequency band measured in  $\mu V^2$ .<sup>{1}</sup> Visually this can be represented in a *power spectrum*. The power spectrum of clinical interest is usually considered to extend from about 1.5 Hz to 20 Hz.<sup>{2}</sup> This frequency range has traditionally been separated into 4 frequency bands: delta (1.5 -4 Hz), theta (4-8 Hz), alpha (8-13 Hz), and beta (13-20 Hz).<sup>{1}</sup>

### Quantitative EEG Parameters

#### Absolute power:

Amount of EEG activity in a particular frequency band measured in  $\mu V^2$ .<sup>{1}</sup>

#### BIS index

The Bispectral (BIS) index is determined from frontal EEG data using a complex mathematical algorithm.

#### Dominant/Peak frequency

Frequency with the maximal power.

#### Mean/Centroid frequency

The mean or centroid frequency is the frequency that divides the area of the spectrum into two equal parts.<sup>{3}</sup>

#### Peak power

Value of maximal power in certain frequency interval.

### Relative power:

Quotient between power in one frequency band and total power across all bands, expressed as a percentage. {1}

### Spectral edge frequency

The frequency below which 95 percent the total power of a given signal is located.

### $\alpha/\theta$ or $\theta/\alpha$ :

Quotient of relative power of alpha and theta frequency bands. {1}

### $\beta+\alpha/\theta+\delta$ :

Quotient of the relative power of alpha plus beta frequency bands and the relative power of theta +delta frequency bands. {1}

### % theta time/% alpha time

The ratio of wave output over time (wave % time) of theta waves (indicative of slowing of EEG activity) to alpha waves. {4}

### **Power spectrum**

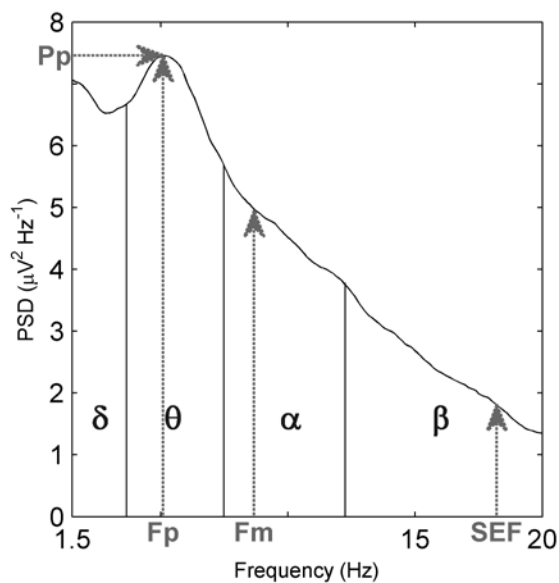

**Definitions of abbreviations:** PSD= Power Spectral Density; Pp= Peak Power; Fp= Peak Frequency; Fm= Mean Frequency; SEF= Spectral Edge Frequency.

## REFERENCE LIST

1. Nuwer MR: Quantitative EEG: I. Techniques and problems of frequency analysis and topographic mapping. *J Clin Neurophysiol* 1988;5:1-43.
2. Hughes JR, John ER: Conventional and quantitative electroencephalography in psychiatry. *J Neuropsychiatry Clin Neurosci* 1999;11:190-208.
3. Plaschke K, Hill H, Engelhardt R et al: EEG changes and serum anticholinergic activity measured in patients with delirium in the intensive care unit. *Anaesthesia* 2007;62:1217-1223.
4. Matsushima E, Nakajima K, Moriya H et al: A psychophysiological study of the development of delirium in coronary care units. *Biol Psychiatry* 1997;41:1211-1217.
